# Supplementary material for: Timing of Resource Addition Affects the Migration Behavior of Wood Decomposer Fungal Mycelia
Source: MDPI journal article supplement (doi:10.3390/jof7080654), 2021-08-12
Supplement: s1 [file s1]

## Supplementary Figure S1

Time-series photo images of mycelium of *Pholiota brunnescens*, *Phanerochaete velutina*, and *Resinicium bicolor* grew from inoculum on non-sterile compressed soil in Petri dishes (576 cm<sup>2</sup>) in early-baited and wait experiments. (I) indicates inoculum wood blocks. (B) indicates bait wood blocks. One side length of each wood block is 1.5 cm.

## Supplementary Figure S2

Photo images of inoculum and bait wood blocks of *Pholiota brunnescens*, *Phanerochaete velutina*, and *Resinicium bicolor* 7 days after transferred onto a new soil dish in early-baited and wait experiments.

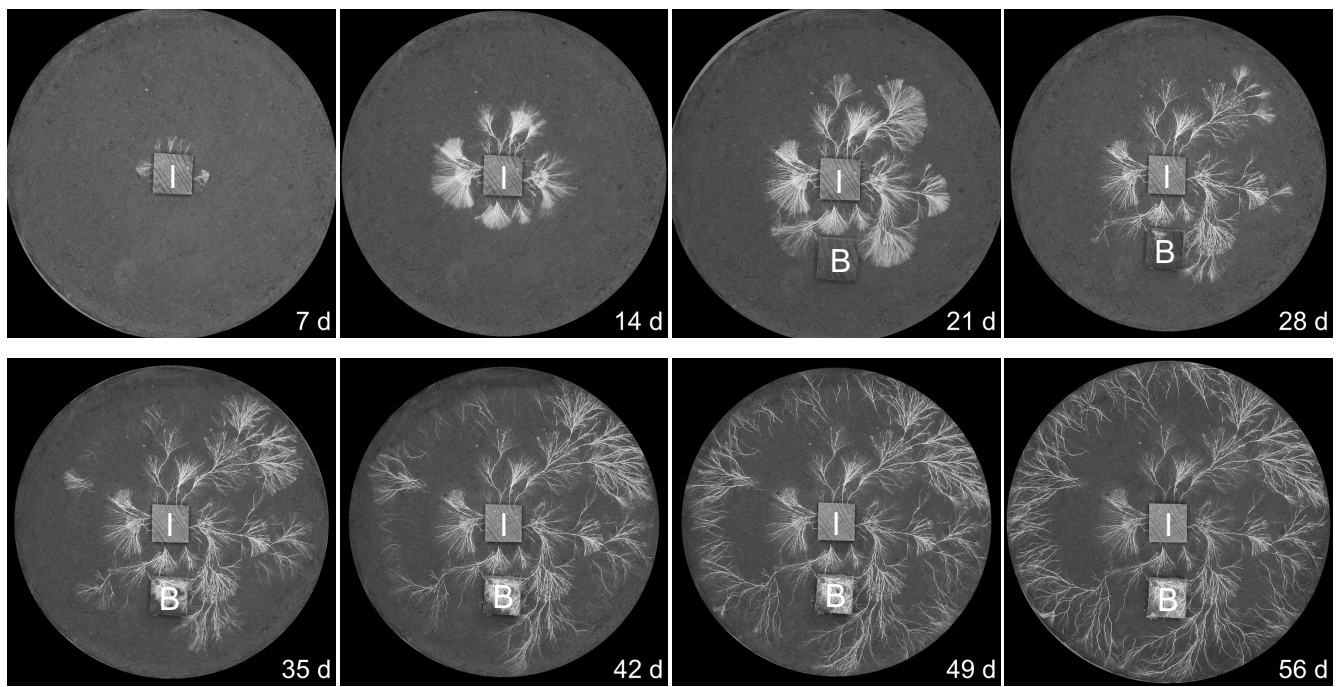

Fig. S1a Time-series photo images of mycelium of *Pholiota brunnescens* (Pb\_B18) in early-baited experiment grew from inoculum (I). A fresh wood bait (B) was added at 14 d.

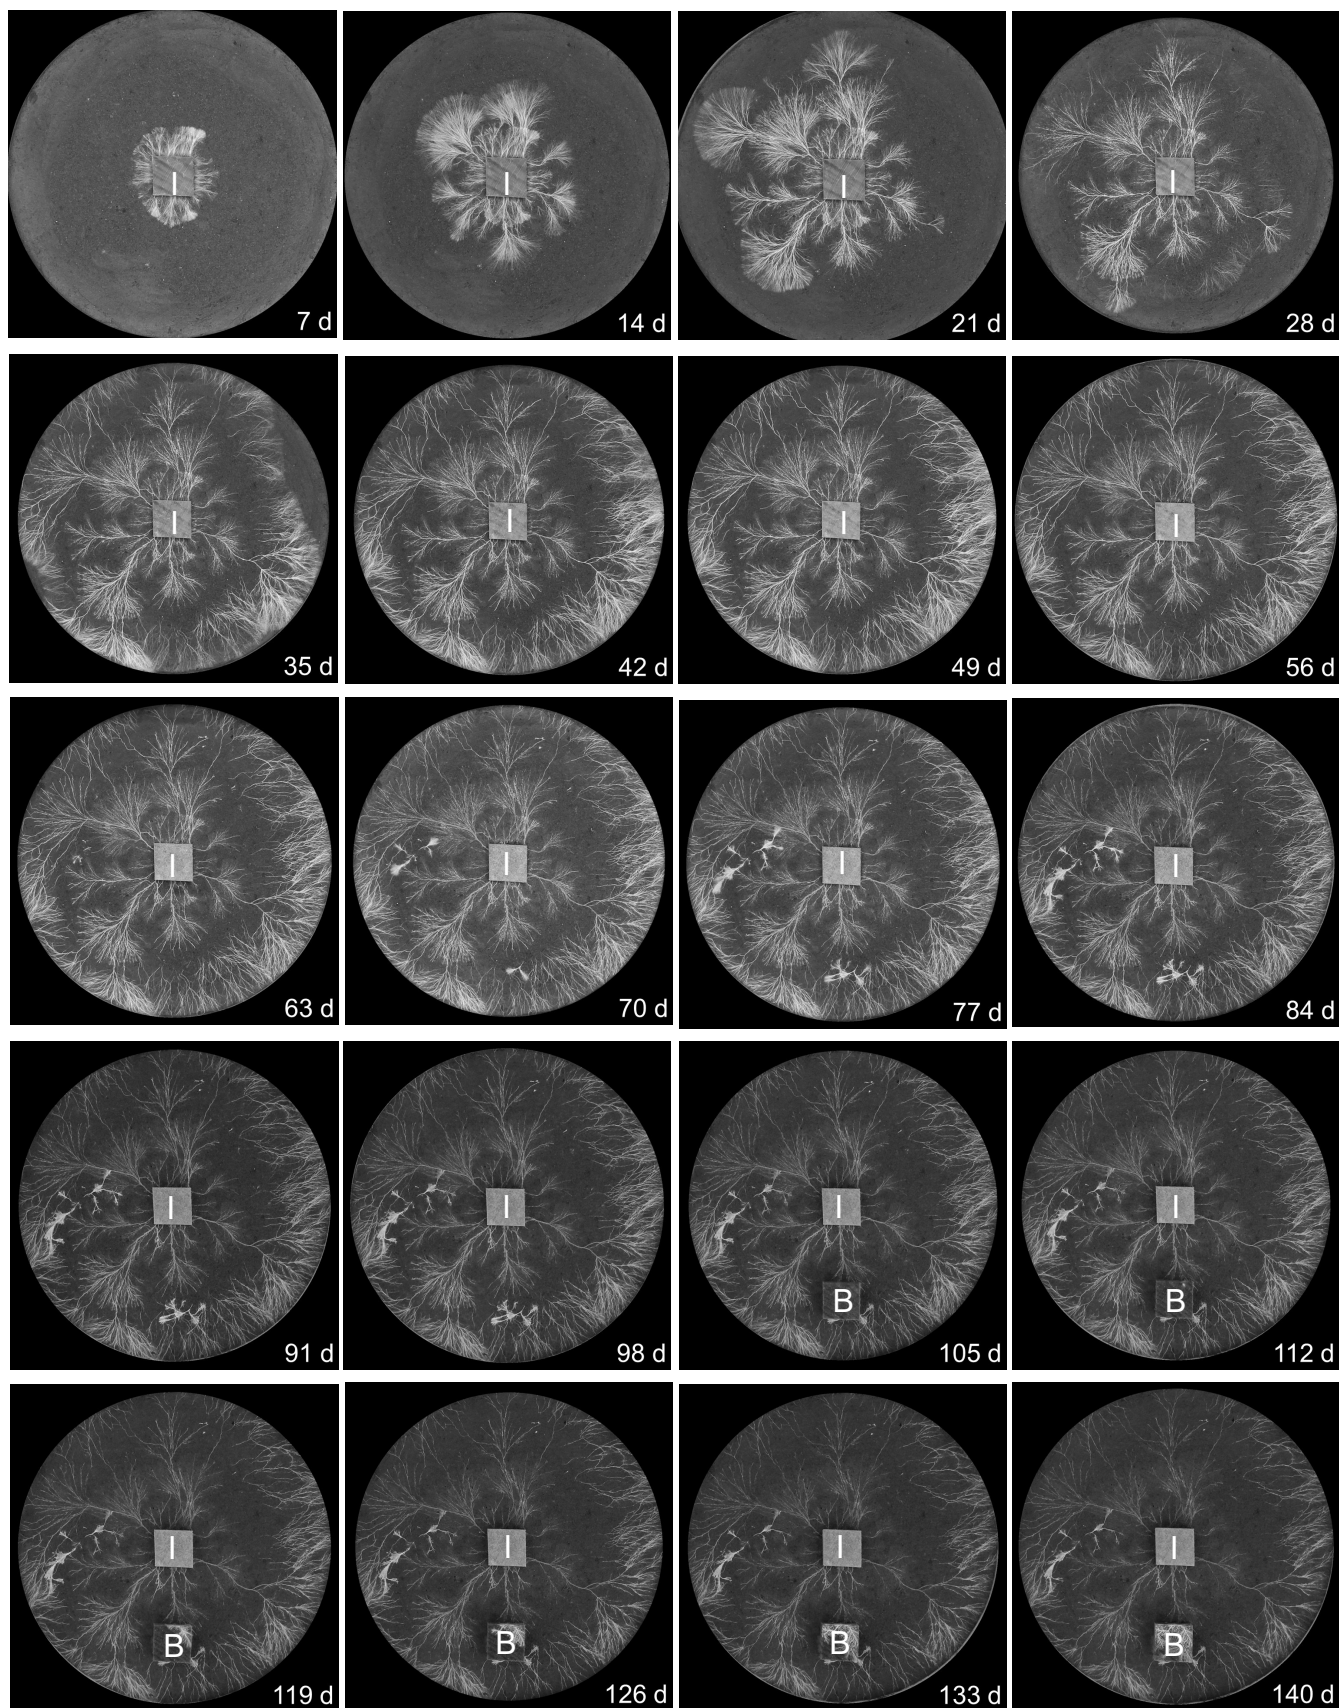

Fig. S1b Time-series photo images of mycelium of *Pholiota brunnescens* (Pb\_B11) in wait experiment grew from inoculum (I). A fresh wood bait (B) was added at 98 d.

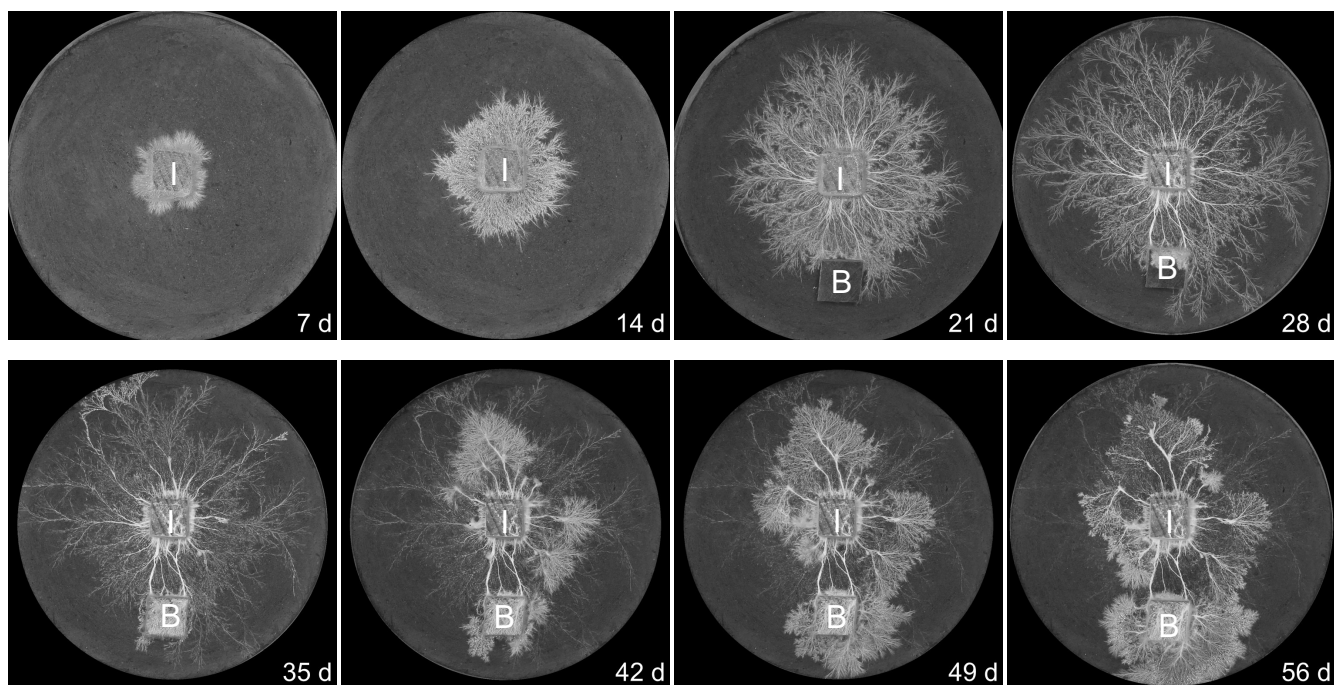

Fig. S1c Time-series photo images of mycelium of *Phanerochaete velutina* (Pv\_B6) in early-baited experiment grew from inoculum (I). A fresh wood bait (B) was added at 98 d.



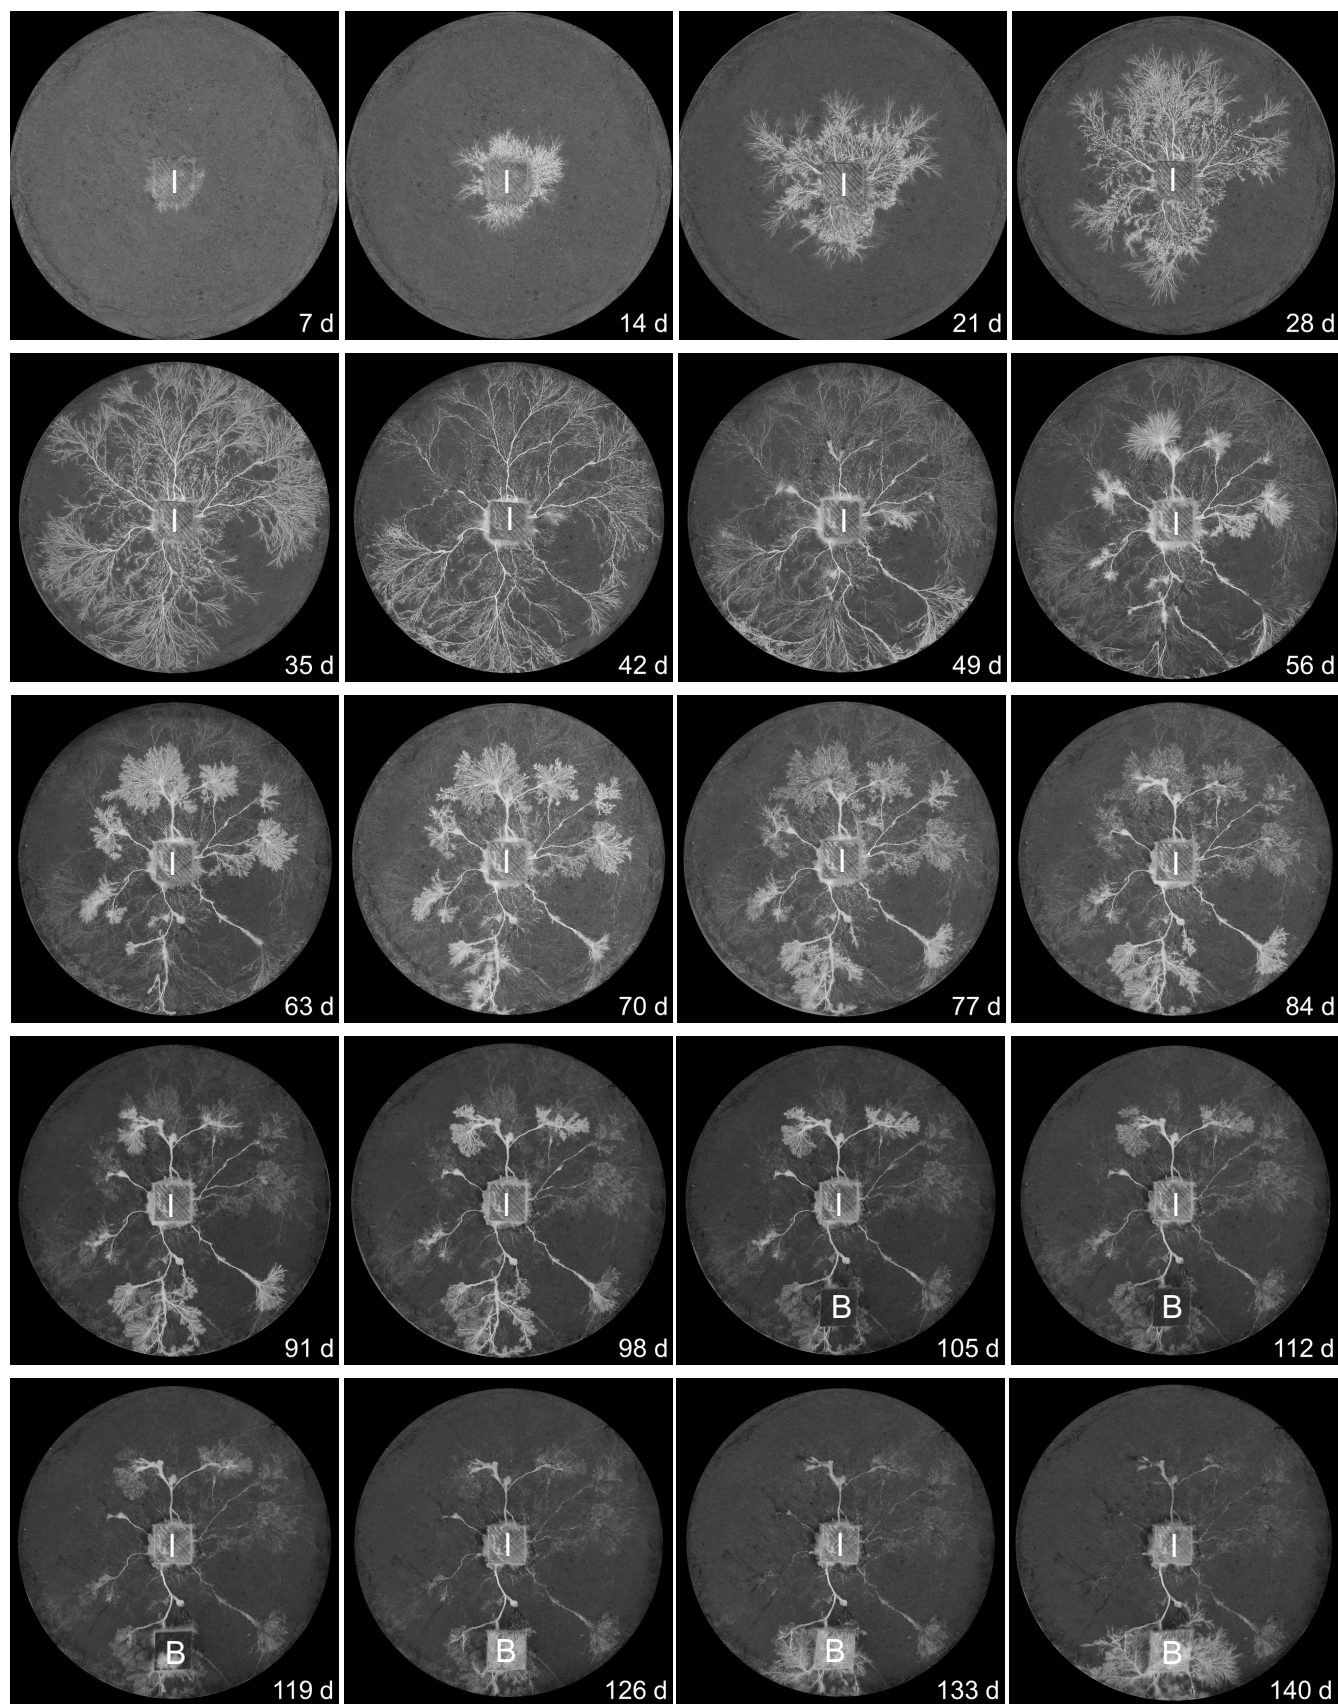

Fig. S1d Time-series photo images of ¥ mycelium of *Phanerochaete velutina* (Pv\_B13) in wait experiment grew from inoculum (I). A fresh wood bait (B) was added at 98 d.

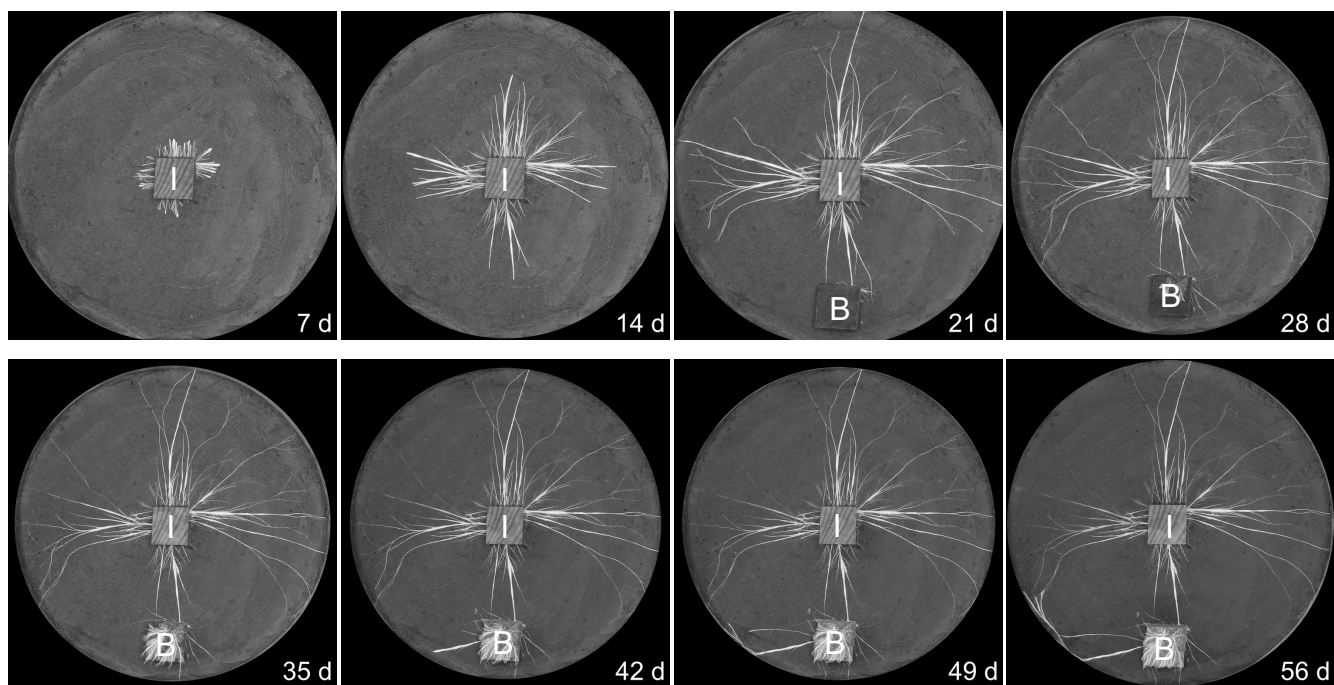

Fig. S1e Time-series photo images of mycelium of *Resinicium bicolor* in early-baited experiment grew from inoculum (I). A fresh wood bait (B) was added at 14 d.

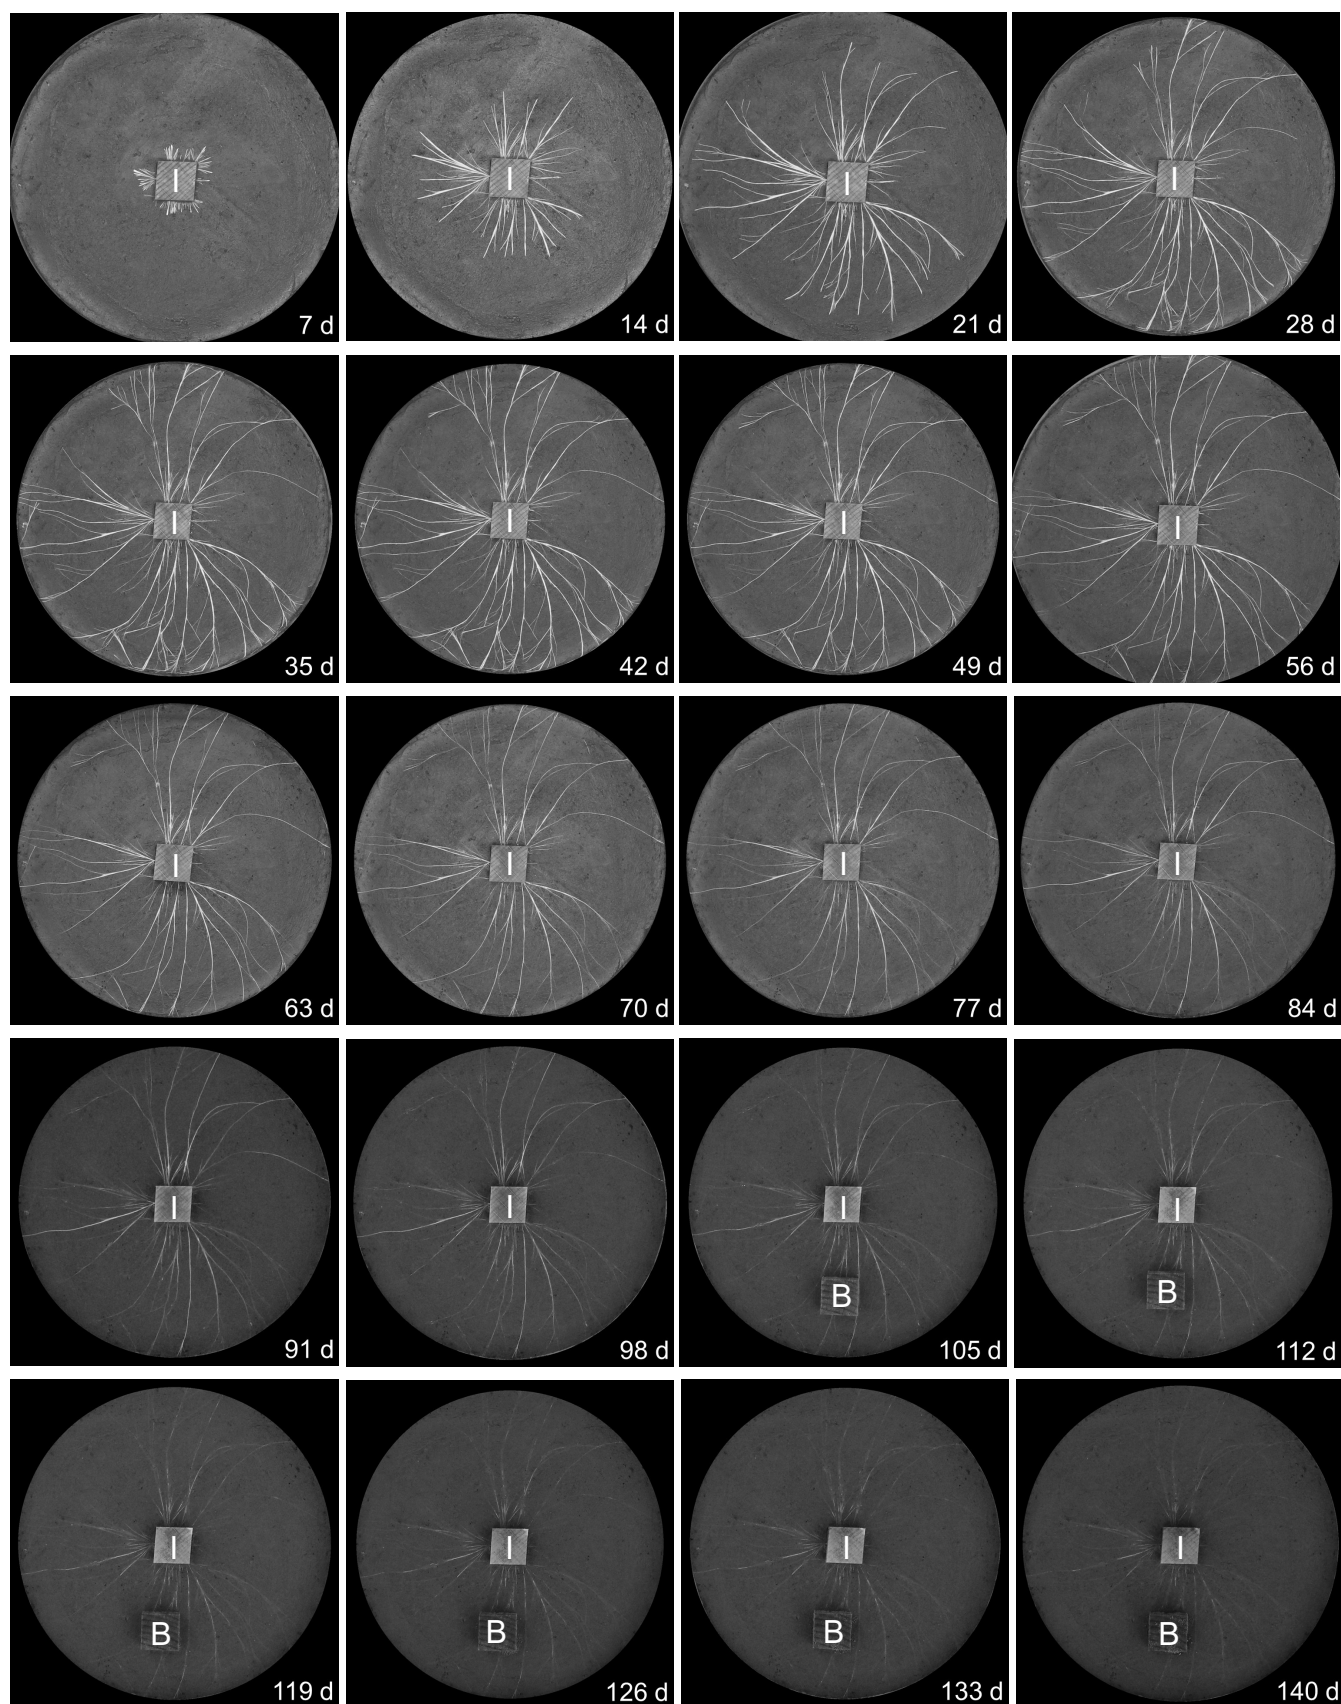

Fig. S1f Time-series photo images of mycelium of *Resinicium bicolor* in wait experiment grew from inoculum (I). A fresh wood bait (B) was added at 98 d.

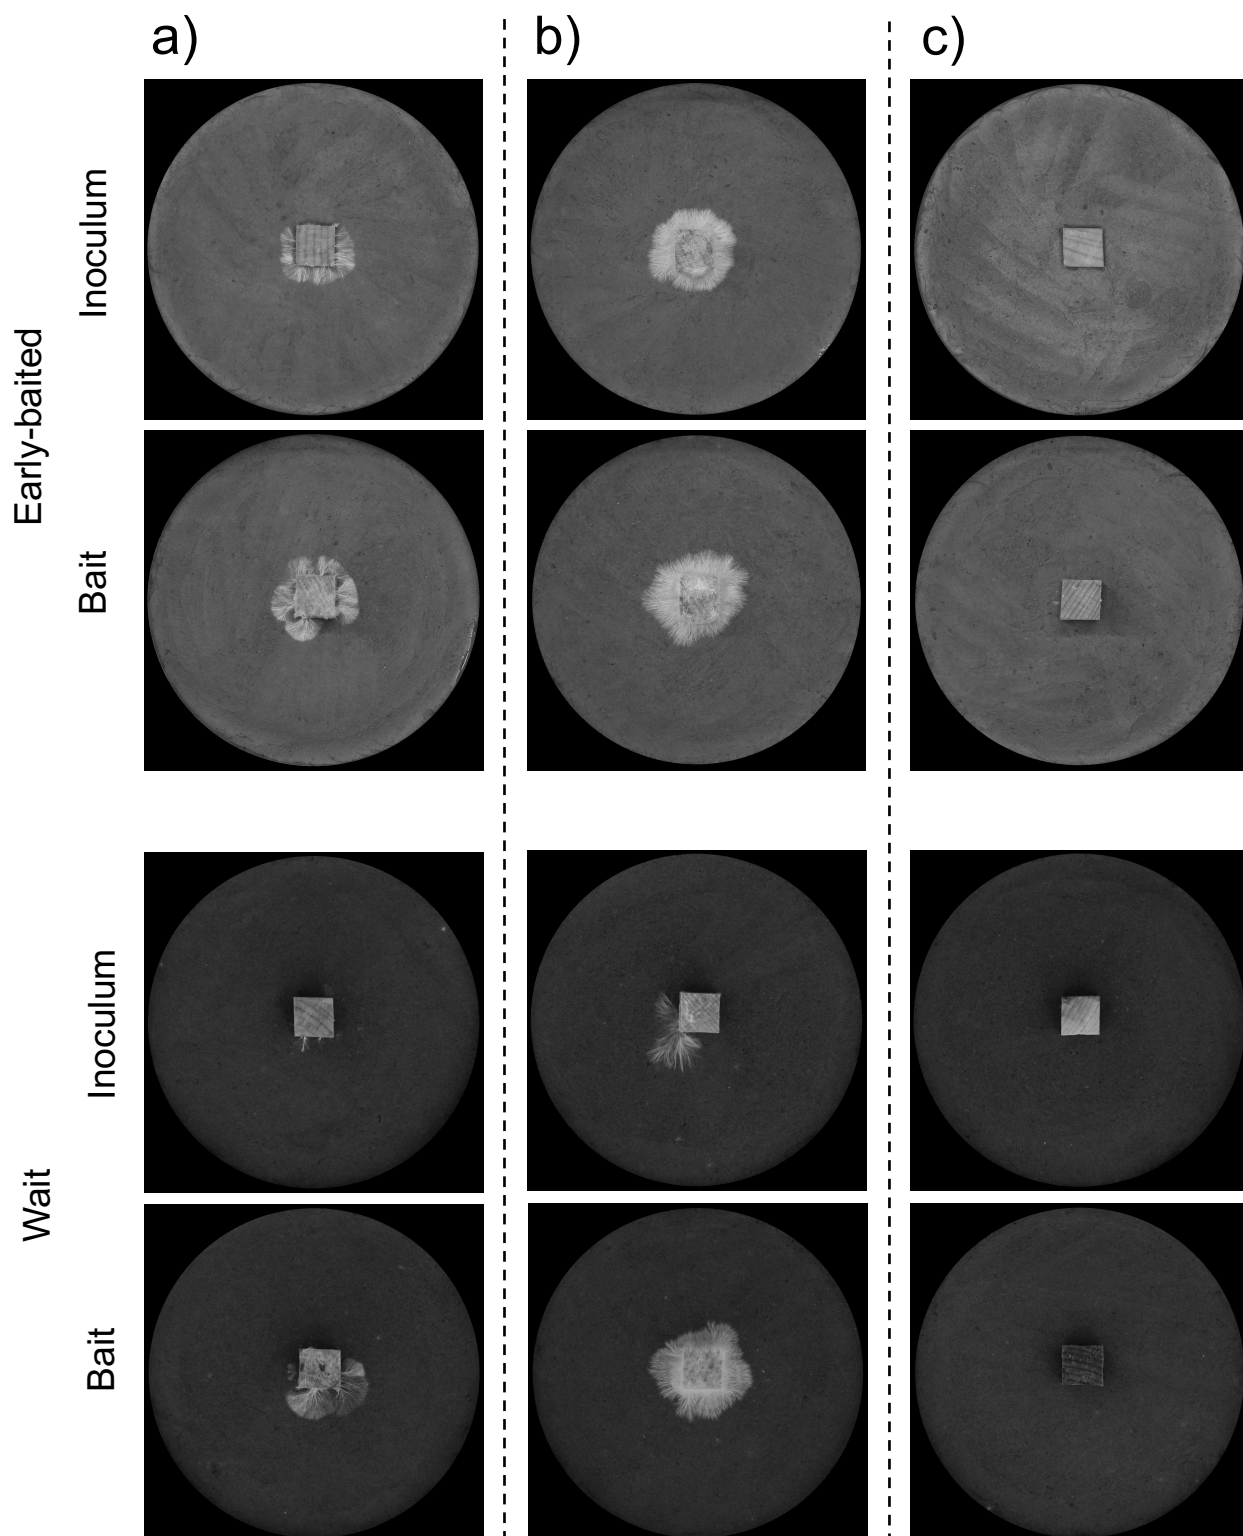

Fig. S2 Photo images of inoculum and bait wood blocks of a) *Pholiota brunnescens*, b) *Phanerochaete velutina*, and c) *Resinicium bicolor* 7 days after transferred onto a new soil dish in early-baited and wait experiments. Note that the relative position of inoculum and bait photos reflects their relative positions on soil before transfer (i.e., a bait located at bottom side of an inoculum, see Figs. 1 and Fig. S1).
